# Supplementary material for: Glutathione-sensitive mesoporous nanoparticles loaded with cinnamaldehyde for chemodynamic and immunological therapy of cancer
Source: Royal Society of Chemistry journal article supplement (doi:10.1039/d3tb01094e), 2023-01-01
Supplement: d3tb01094e1.pdf [file d3tb01094e1.pdf]

## Supporting Information

# Glutathione-sensitive Mesoporous Nanoparticles Loaded with Cinnamaldehyde for Chemodynamic and Immunological Therapy of Cancer

*Lichong Zhu<sup>a</sup>, Wenyue Li<sup>a</sup>, Chuang Liu<sup>a</sup>, Saisai Yue<sup>a</sup>, Yuanyuan Qiao<sup>a</sup>, Yingying Cui<sup>a</sup>,*

*Junwei Cheng<sup>a</sup>, Ming Zhang<sup>c</sup>, Peisen Zhang<sup>a,\*</sup>, Beibei Zhang<sup>b,\*</sup>, Yi Hou<sup>a,\*</sup>*

<sup>a</sup>College of Life Science and Technology, Beijing University of Chemical Technology, Beijing, 100029, China.

<sup>b</sup>College of Bioengineering, Henan University of Technology, Zhengzhou, Henan 450001, China.

<sup>c</sup>Department of Pathology, Peking University International Hospital, Beijing, 102206, China.

\*Corresponding authors: zhangps@iccas.ac.cn; zhangbb058@163.com; houyi@iccas.ac.cn

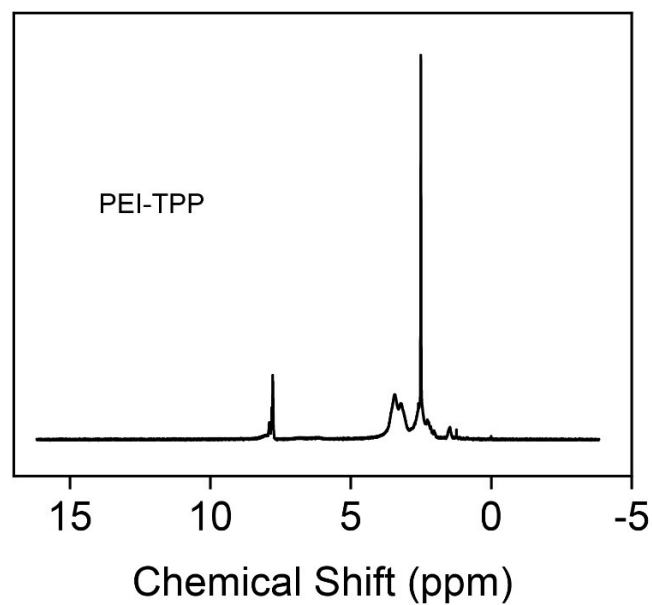

**Figure S1.** The  $^1\text{H}$  NMR spectra of the PEI-TPP.

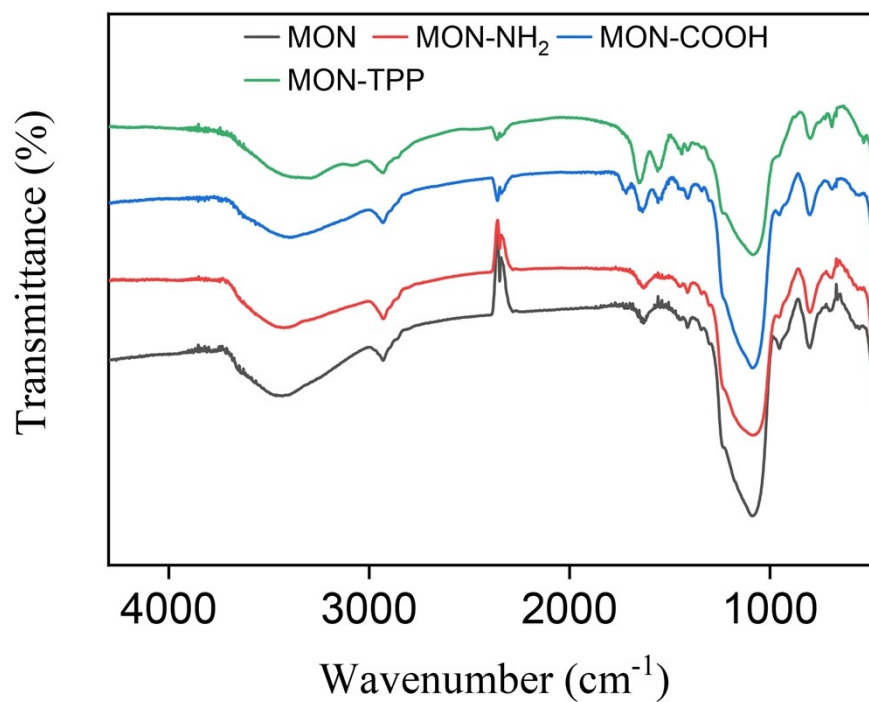

**Figure S2.** The Fourier transform infrared spectroscopy of different nanoparticles.

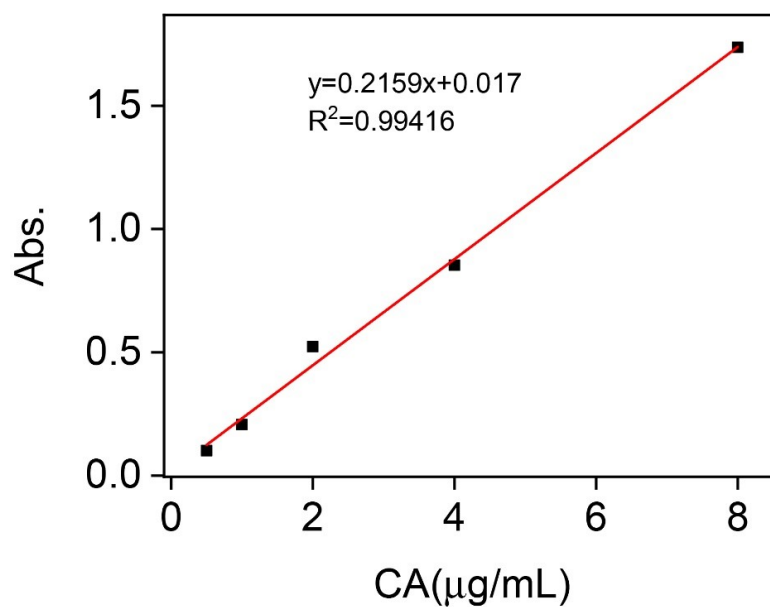

**Figure S3.** The standard curve of CA at 290 nm.

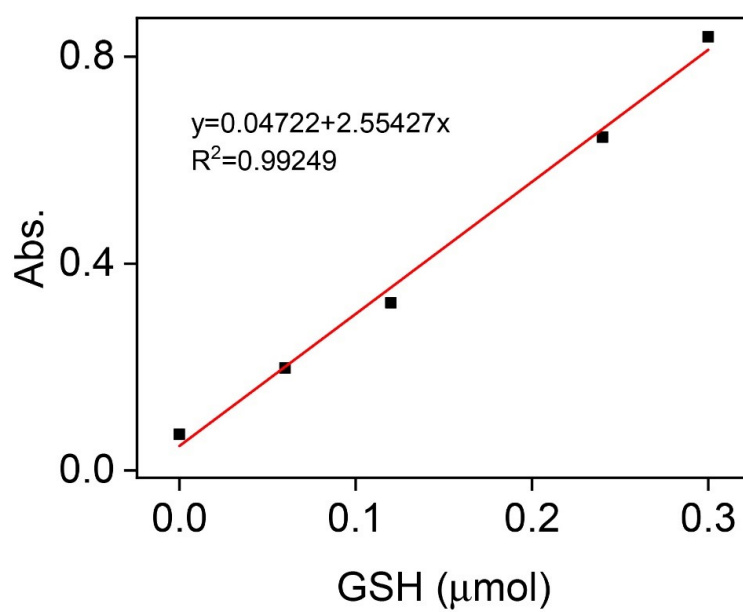

**Figure S4.** The standard curve of the reaction of GSH between and DTNB at 412 nm.

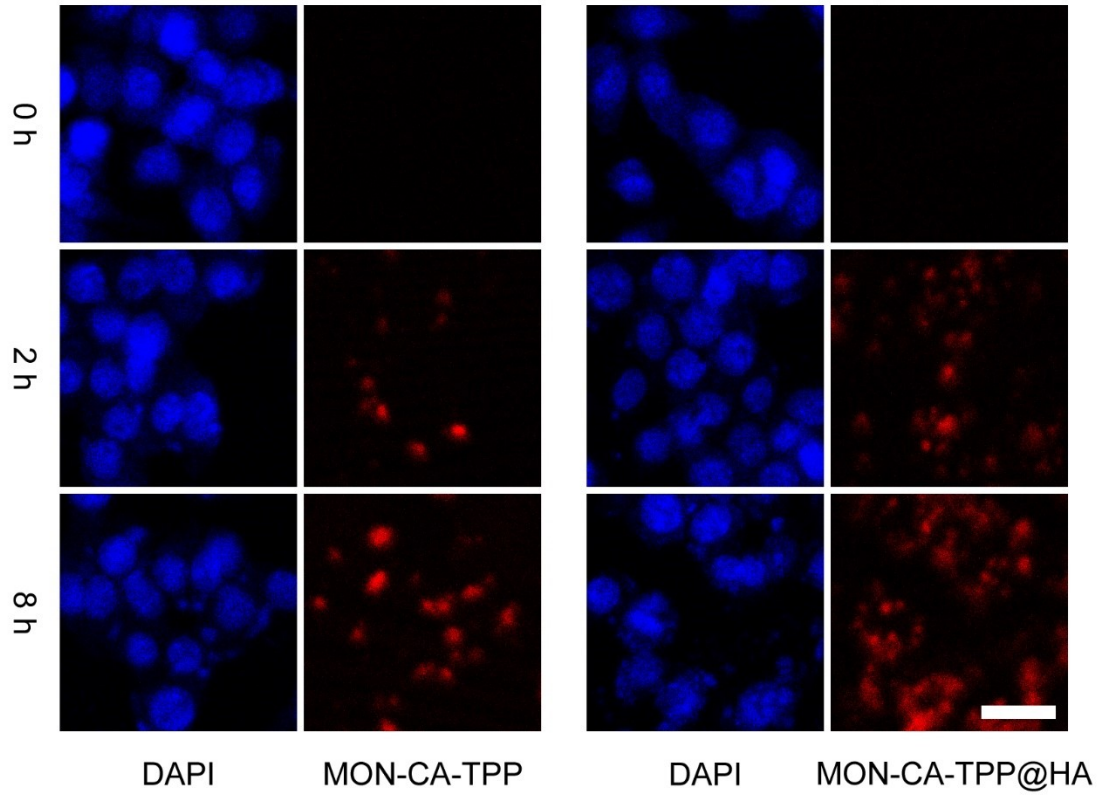

**Figure S5.** The cell uptake images of MON-CA-TPP and MON-CA-TPP@HA. Scale bar: 25  $\mu\text{m}$ .

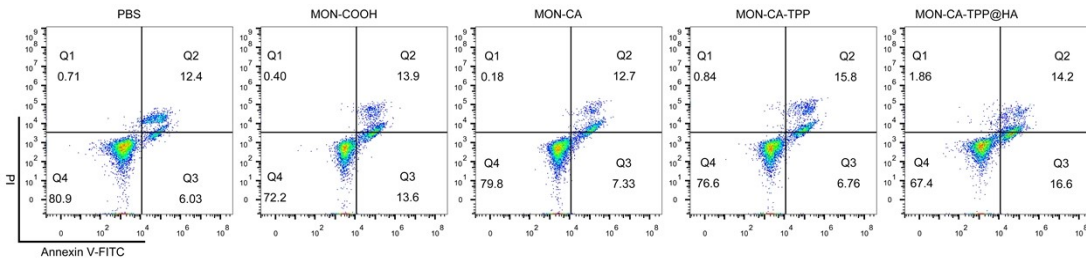

**Figure S6.** Flow cytometry apoptosis assay stained with annexin-FITC and PI after varying treatment.

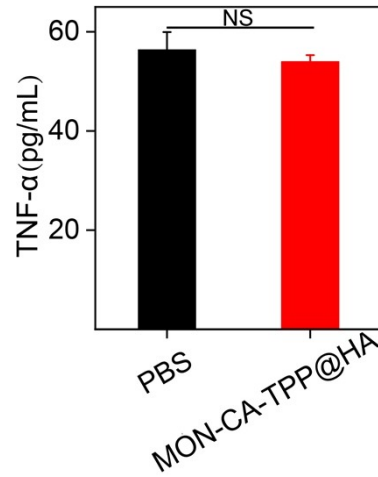

**Figure S7.** ELISA analysis of TNF- $\alpha$  in tumor tissues. Statistical significances, T test (\* $p < 0.05$ , \*\*\* $p < 0.001$ ). NS: no significance.

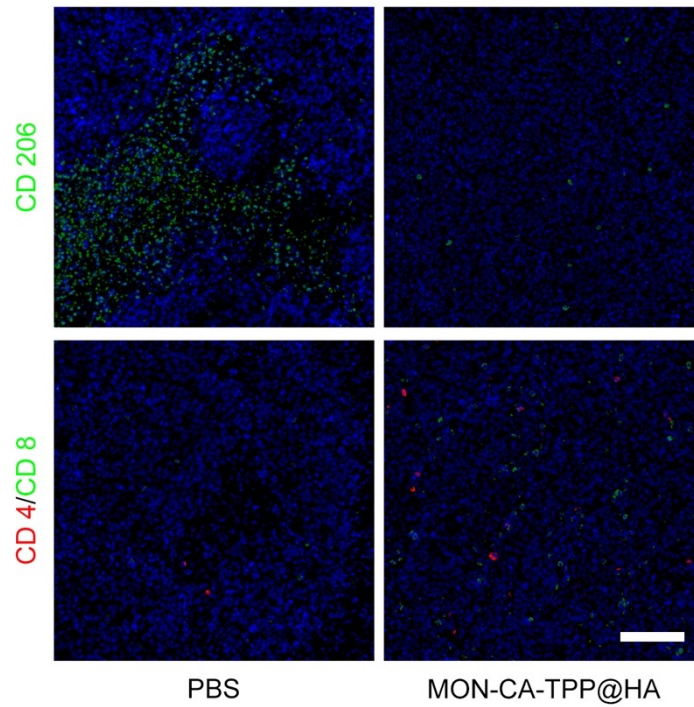

**Figure S8.** Immunofluorescence images of tumor tissue slices showing the staining of T cell markers (CD 4, red; CD 8, green) and M2 macrophages (CD 206). Scale bar: 100  $\mu\text{m}$ .

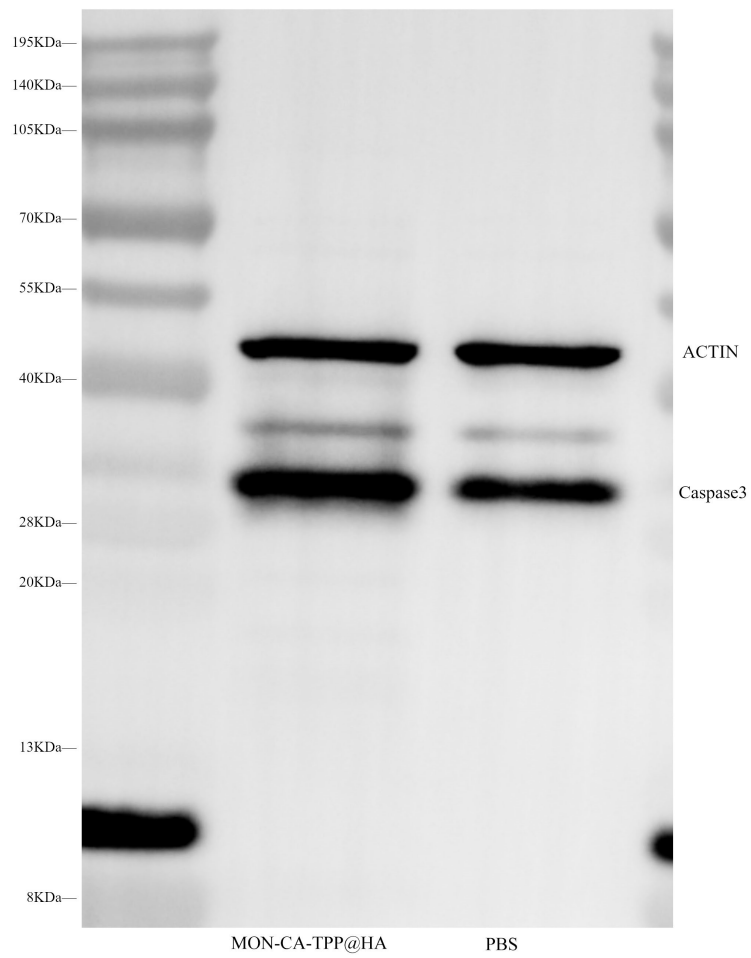

**Figure S9.** The picture of whole blots.

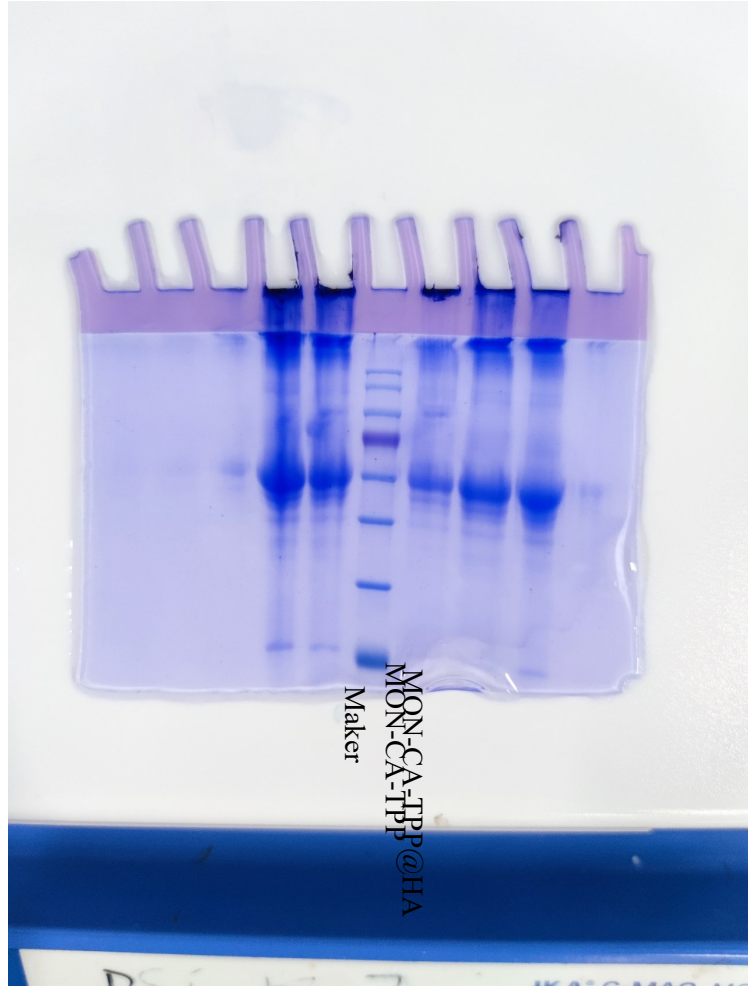

**Figure S10.** The raw data of gel electrophoresis images.
